# Supplementary material
Source: PubMed Central journal article supplement (PMC6927814)

**b**

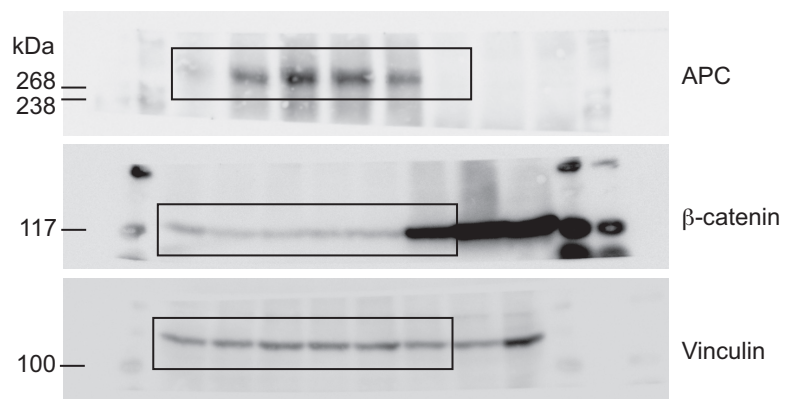

Supplement: EMS84427-supplement-Schmidt_unprocessed_blots_ED1.pdf [file EMS84427-supplement-Schmidt_unprocessed_blots_ED1.pdf]

**b**

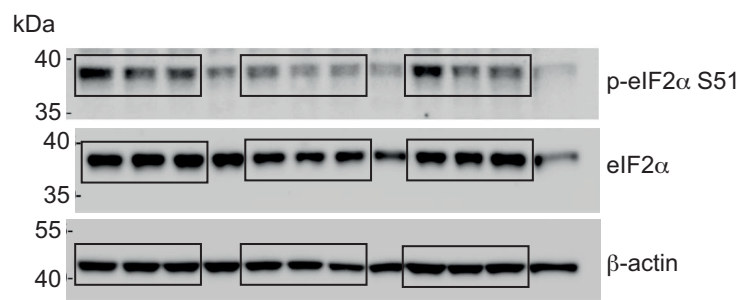

Supplement: EMS84427-supplement-Schmidt_unprocessed_blots_ED10.pdf [file EMS84427-supplement-Schmidt_unprocessed_blots_ED10.pdf]

# Source Data Extended Data 2

**b**

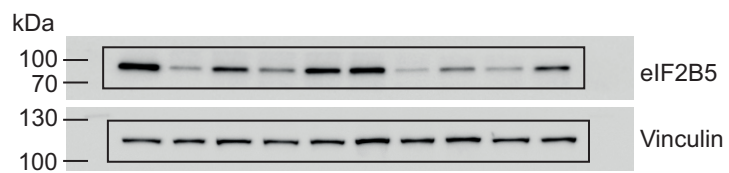

**d**

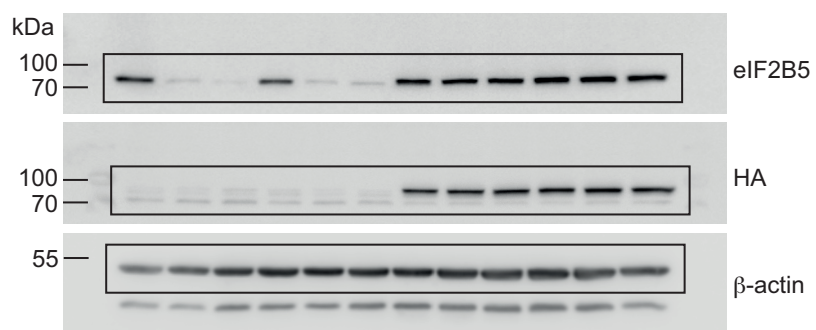

Supplement: EMS84427-supplement-Schmidt_unprocessed_blots_ED2.pdf [file EMS84427-supplement-Schmidt_unprocessed_blots_ED2.pdf]

# Source Data Extended Data 4

**a**

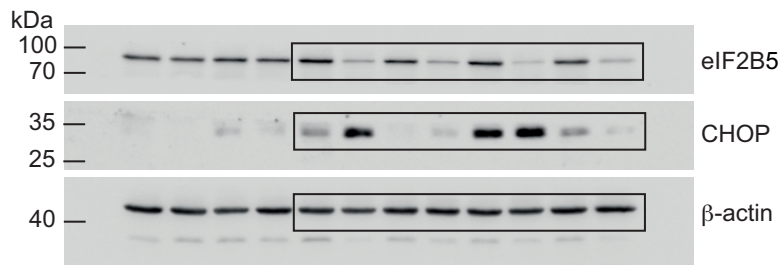

**b**

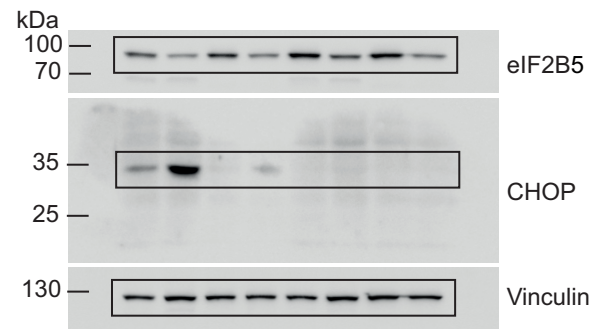

**e**

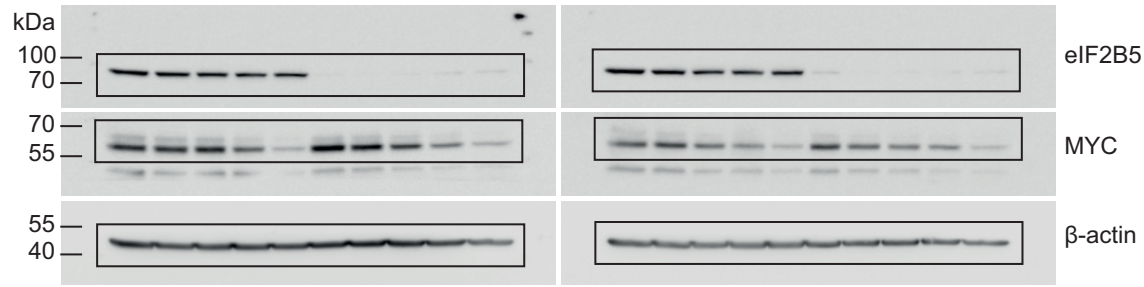

**f**

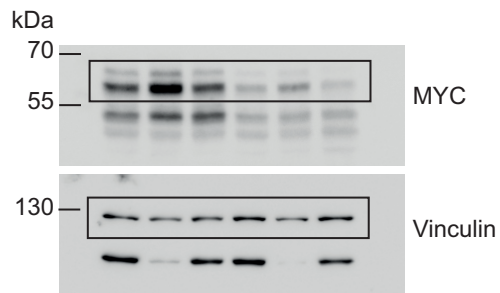

**h**

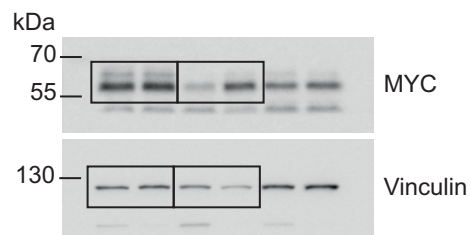

Supplement: EMS84427-supplement-Schmidt_unprocessed_blots_ED4.pdf [file EMS84427-supplement-Schmidt_unprocessed_blots_ED4.pdf]

# Source Data Extended Data 5

**a**

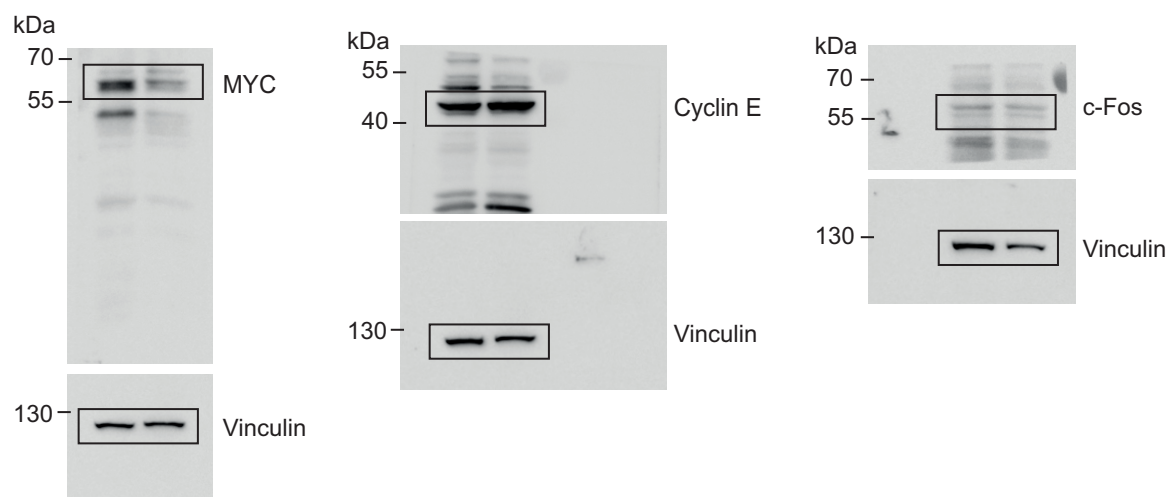

**d**

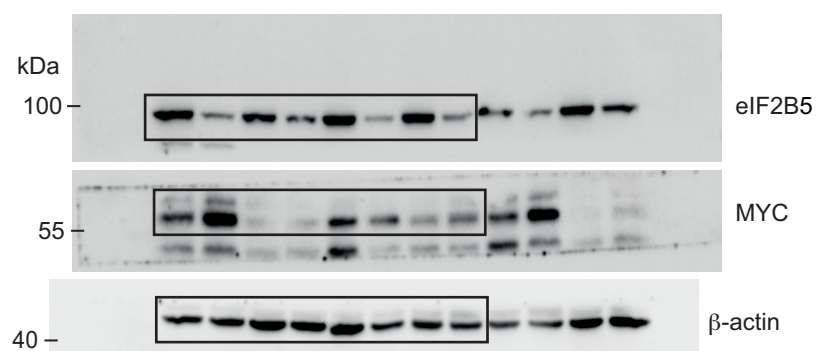

Supplement: EMS84427-supplement-Schmidt_unprocessed_blots_ED5.pdf [file EMS84427-supplement-Schmidt_unprocessed_blots_ED5.pdf]

# Source Data Extended Data 6

**a**

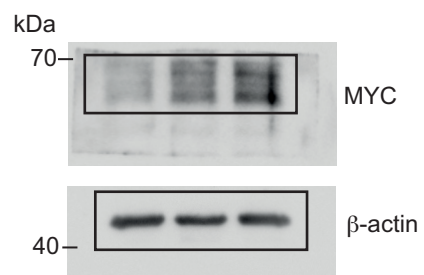

**g**

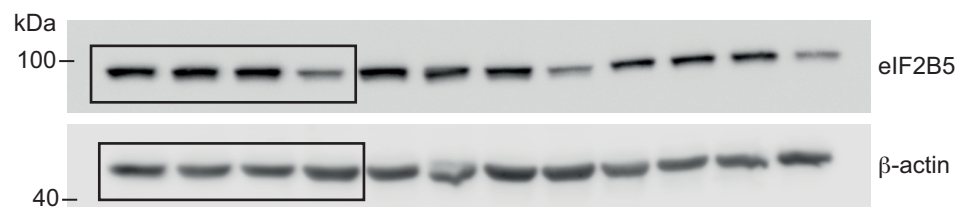

Supplement: EMS84427-supplement-Schmidt_unprocessed_blots_ED6.pdf [file EMS84427-supplement-Schmidt_unprocessed_blots_ED6.pdf]

**c**

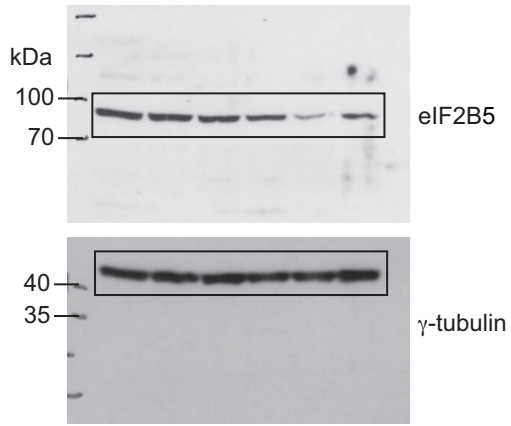

Supplement: EMS84427-supplement-Schmidt_unprocessed_blots_ED7.pdf [file EMS84427-supplement-Schmidt_unprocessed_blots_ED7.pdf]

**c**

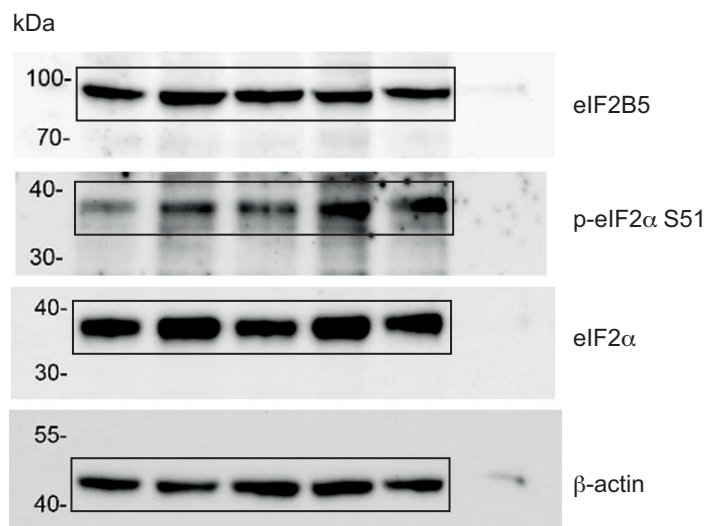

Supplement: EMS84427-supplement-Schmidt_unprocessed_blots_ED8.pdf [file EMS84427-supplement-Schmidt_unprocessed_blots_ED8.pdf]

# Source Data Extended Data 9

**a**

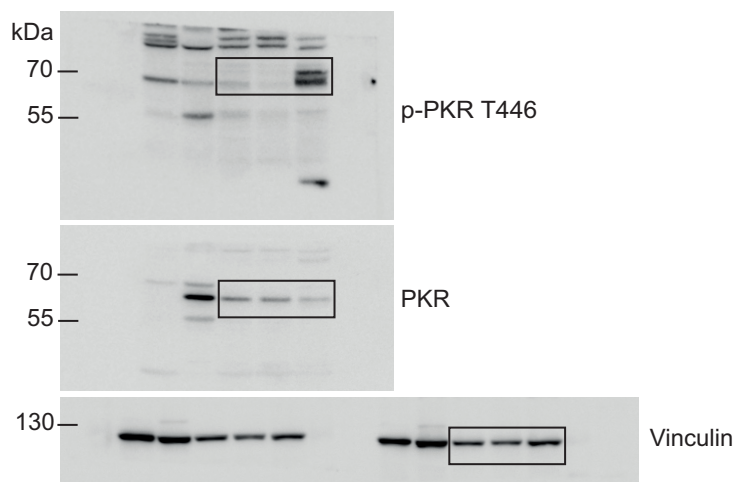

**c**

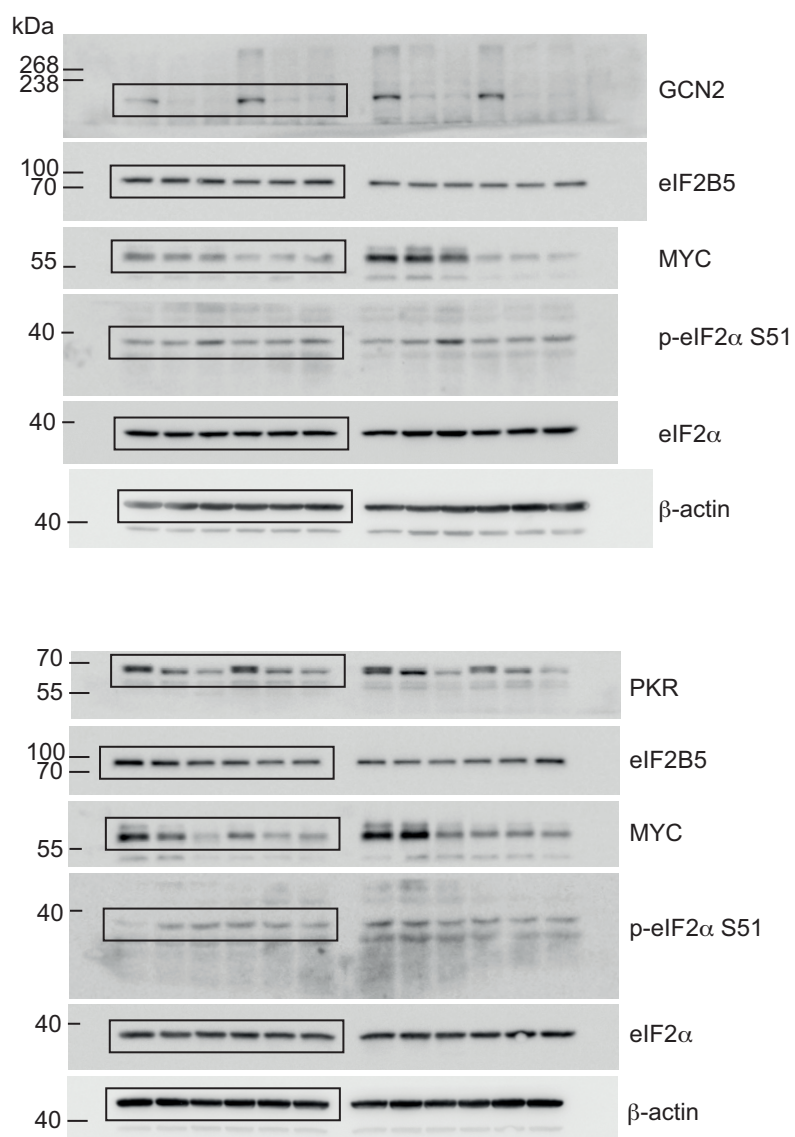

Supplement: EMS84427-supplement-Schmidt_unprocessed_blots_ED9.pdf [file EMS84427-supplement-Schmidt_unprocessed_blots_ED9.pdf]

# Source Data Figure 1

**a**

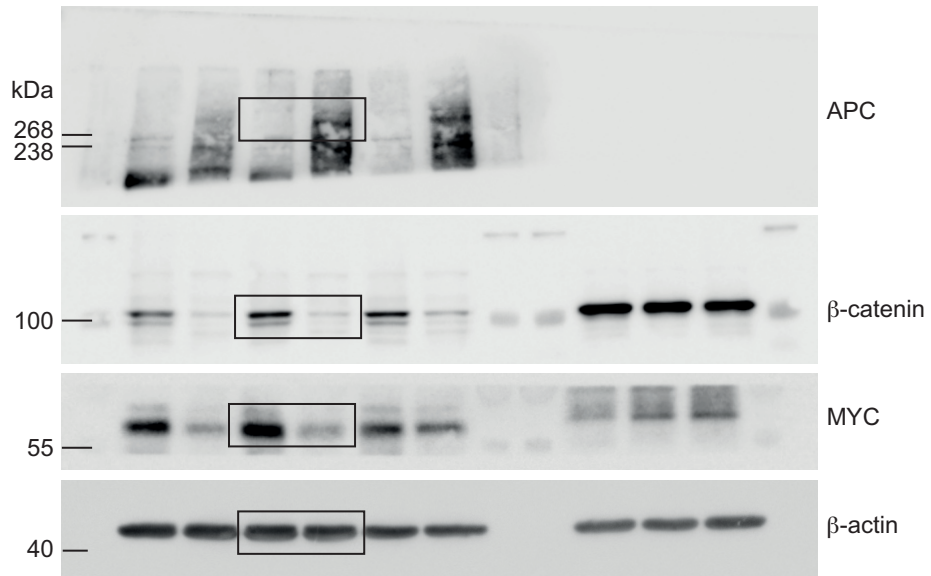

Supplement: EMS84427-supplement-Schmidt_unprocessed_blots_Fig_1.pdf [file EMS84427-supplement-Schmidt_unprocessed_blots_Fig_1.pdf]

# Source Data Figure 2

**d**

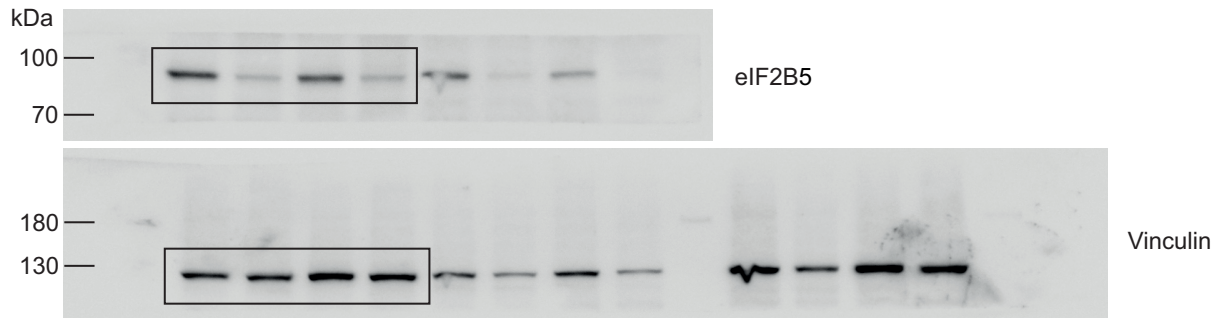

**g**

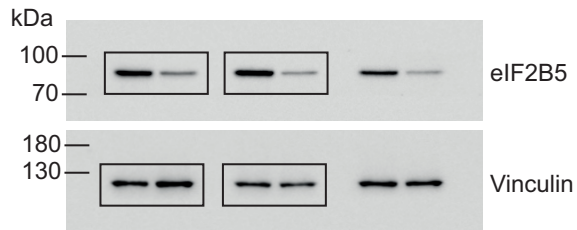

Supplement: EMS84427-supplement-Schmidt_unprocessed_blots_Fig_2.pdf [file EMS84427-supplement-Schmidt_unprocessed_blots_Fig_2.pdf]

# Source Data Figure 4

**a**

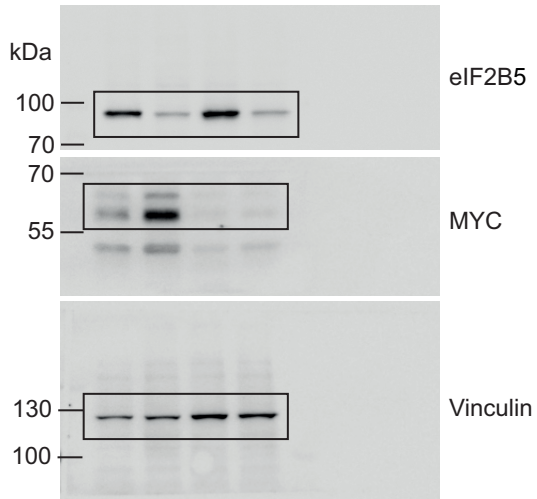

**b**

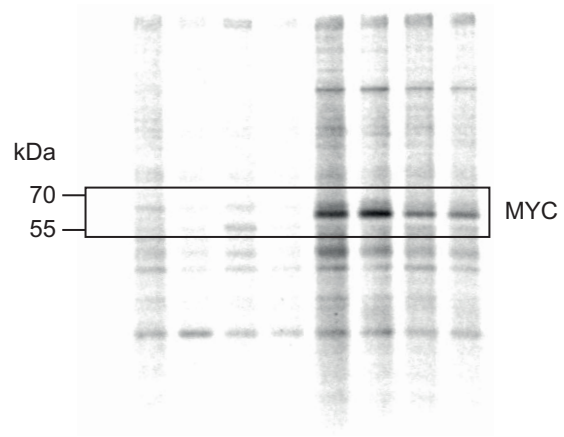

**c**

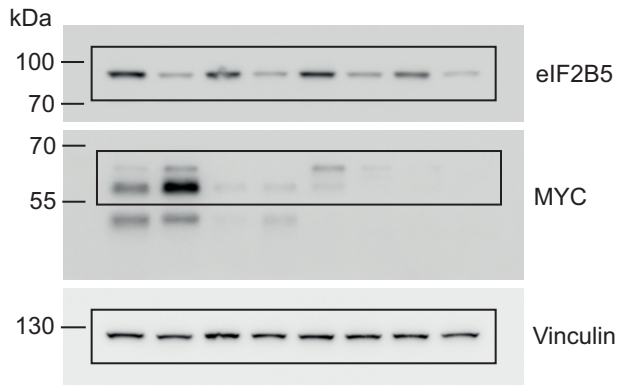

**d**

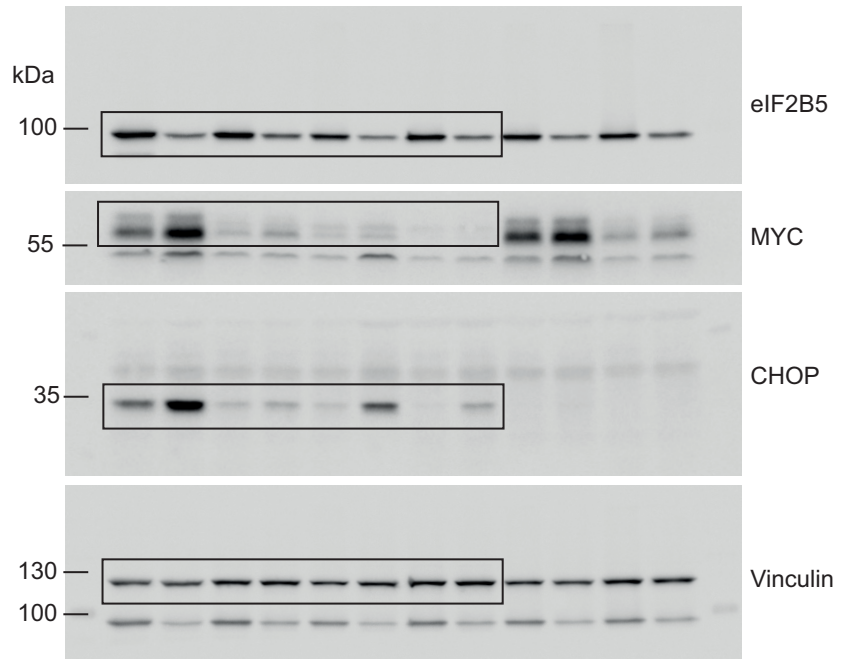

Supplement: EMS84427-supplement-Schmidt_unprocessed_blots_Fig_4.pdf [file EMS84427-supplement-Schmidt_unprocessed_blots_Fig_4.pdf]

# Source Data Figure 6

**a**

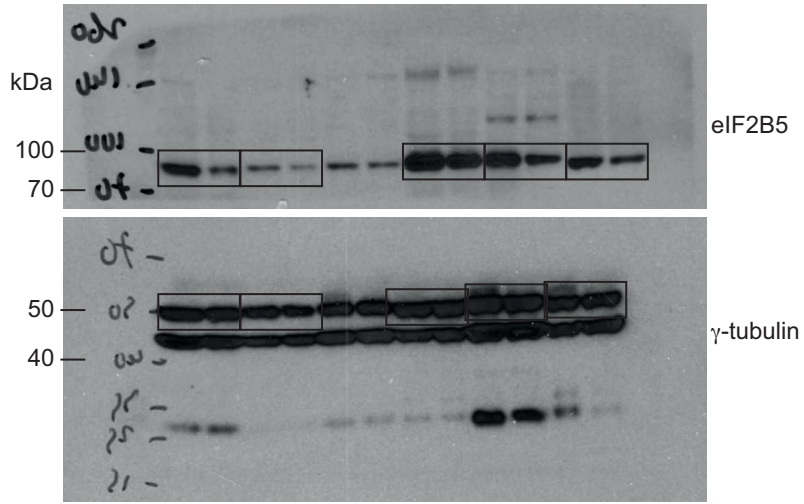

**b**

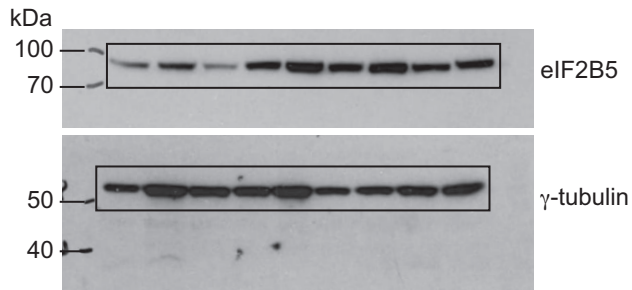

Supplement: EMS84427-supplement-Schmidt_unprocessed_blots_Fig_6.pdf [file EMS84427-supplement-Schmidt_unprocessed_blots_Fig_6.pdf]

# Source Data Figure 7

**a**

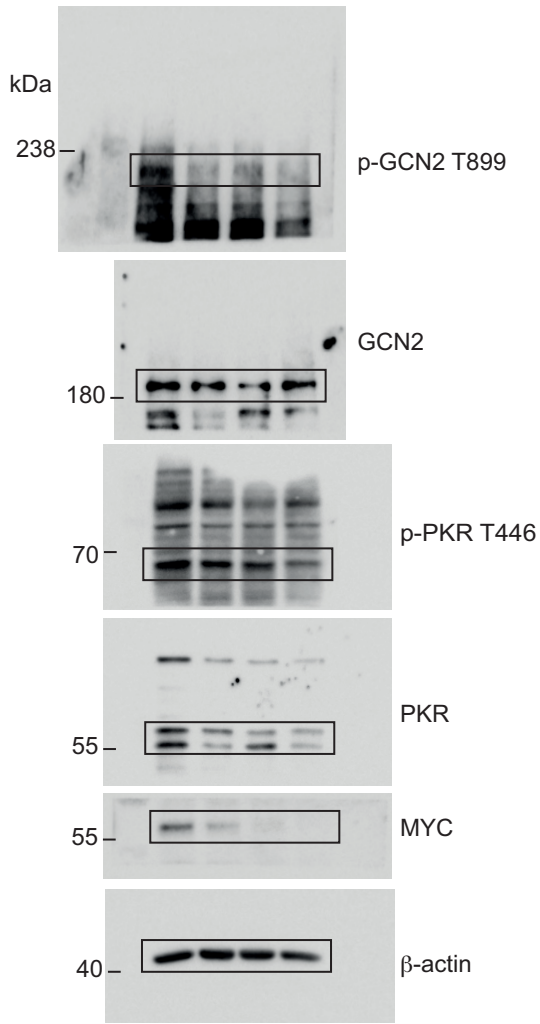

**d**

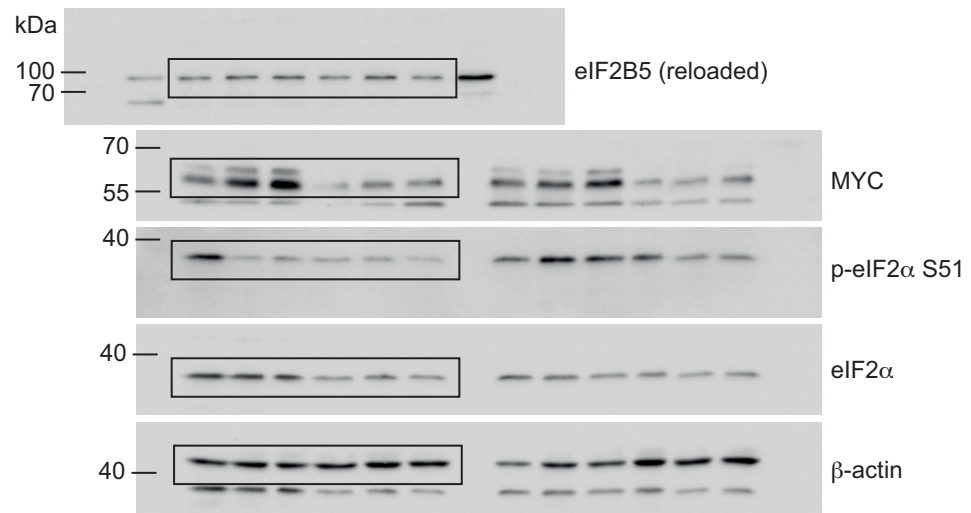

**f**

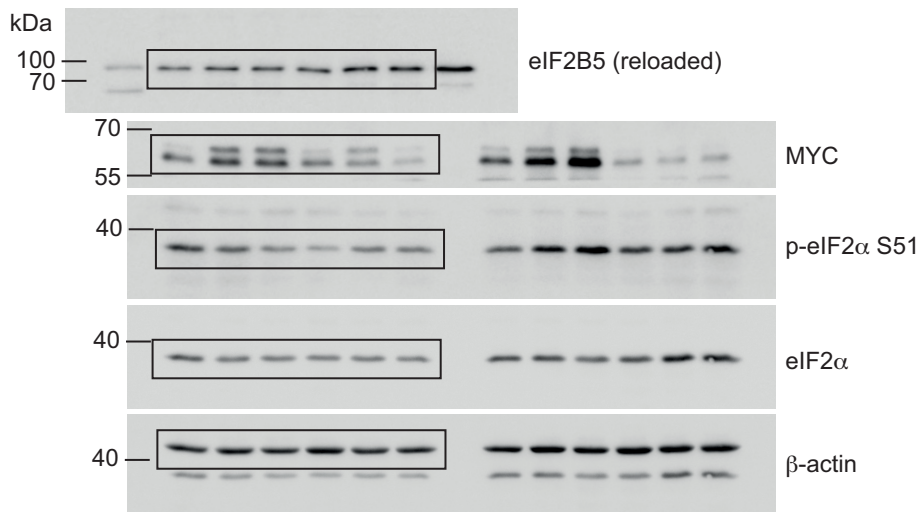

Supplement: EMS84427-supplement-Schmidt_unprocessed_blots_Fig_7.pdf [file EMS84427-supplement-Schmidt_unprocessed_blots_Fig_7.pdf]
